# Supplementary material for: Hybrid Epithelial–Mesenchymal Phenotypes Are Controlled by Microenvironmental Factors
Source: Oxford University Press journal article supplement (doi:10.1158/0008-5472.can-19-3147), 2020-03-26
Supplement: 00085472can193147-sup-230352_2_supp_6140992_q6rs5q.xlsx [file 00085472can193147-sup-230352_2_supp_6140992_q6rs5q.xlsx]

## Sheet: Node_annotations
Node	Type	Max_val	Uniprot IDs	Representative genes	Comments
HGF	Input	1	P14210	HGF	Hepatocyte growth factor (HGF) is a cellular growth and mobility factor. 0 = absence of HGF 1 = presence of HGF
EGF	Input	1	P01133	EGF	Epidermal growth factor (EGF) is a cellular growth factor. 0 = absence of EGF 1 = presence os EGF
ECM	Input	1			Extracellular matrix (ECM) is a mesh of molecules that support physically and biochemically the surrounding cells. 0 = soft substrate 1 = stiff substrate
TGFB	Input	1	P01137	TGFB1	Transforming growth factor beta-1 (TGFB) is a cytokine that regulates cellular growth and differentiation. 0 = absence of TGFB 1 = presence of TGFB
IL6	Input	1	P05231	IL6	Interleukin-6 (IL6) is cytokine involved in pro-inflammatory signaling. It has been linked to EMT in human cervical carcinoma (Miao et al 2014). 0 = absence of IL6 1 = presence of IL6
DELTA	Input	1	O00548	DLL1	Delta-like protein 1 (DELTA) transmembrane ligand protein of NOTCH receptors 0 = absence of Delta 1 = presence of Delta
RPTP_L	Input	1	Q15262	PTPRK	Receptor-type tyrosine-protein phosphatase (PTPR). 0 = absence of RPTP_L 1 = presence of RPTP_L
FAT4_L	Input	1			FAT4-Cadherin ligand 0 = absence of FAT4_L 1 = presence of FAT4L
ROS	Input	1			Reactive oxygen species present in the extracellular micro-environment. 0 = absence of ROS 1 = presence of ROS
WNT	Input	1	P56704	WNT3A	WNTs are a wide family of glycoproteins involved in stemness and development. 0 = absence of WNT 1 = presence of WNT
EGFR	Internal	1	P00533	EGFR	Receptor tyrosine kinase binding the EGF ligands (EGFR). 0 = inactive 1 = active, ligand binding dimer formation and autophosphorylation
HGFR	Internal	1	P08581	MET	Receptor tyrosine kinase binding the HGF (cMET) 0 = inactive 1 = active, ligand binding dimer formation and autophosphorylation
ITG_AB	Internal	1			Integrins are transmembrane receptors composed of 2 subunit (alpha and beta) capable of interact and adhere to the ECM. The combination of the different alpha and beta subunits specify the type of ligand (e.g. fibronectin, vitronectin, collagen and laminin). 0 = normal integrin binding to the ECM 1 = high affinity binding to the ECM, increased avidity for ligand
FAK_SRC	Internal	2	Q05397;P12931	PTK2;SRC	Focal adhesion kinase 1 (FAK) and Proto-oncogene tyrosine-protein kinase (SRC) are non-receptor tyrosine kinases, fundamental in cell migration and involved in different signal pathways. Upon integrin signaling FAK Tyr-397 is phosphorylated thus promoting interaction with SRC and SRC family members, leading to phosphorylation at Tyr-576, Tyr-577 and at additional tyrosine residues. FAK and SRC th…
RAS	Internal	1	P01112;P01116	HRAS;KRAS	Small GTPase HRas and KRas. Alternates between GDP and GTP bound, with the latter triggering signaling cascades such as the mitogen activated protein cascade 0 = inactive, GDP-bound 1 = active, GTP-bound
RAF1	Internal	1	P04049	RAF1	RAF proto-oncogene serine/threonine-protein kinase (RAF1) belongs to the MAPK pathway and acts as link between RAS and the following kinases MEK/ERK. 0 = inactive 1 = phosphorylated, kinase domain active
MEK	Internal	1	Q02750	MAP2K1	Dual specificity mitogen-activated protein kinase kinase 1 (MEK) it regulates ERK integrating sevaral biochemical inputs 0 = inactive 1 = phosphorylated, kinase domain active
ERK	Internal	1	P27361;P28482	MAPK3;MAPK1	Mitogen-activated protein kinase 3/1 (ERK1/ERK2) it regulates several transcription factors (e.g. CREB, MYC) 0 = inactive 1 = phosphorylated, kinase domain active
PI3K	Internal	1	P42336	PIK3CA	Phosphoinositide-3-kinase (PI3K) that phosphorylates PtdIns (Phosphatidylinositol), PtdIns4P (Phosphatidylinositol 4-phosphate) and PtdIns(4,5)P2 (Phosphatidylinositol 4,5-bisphosphate) to generate phosphatidylinositol 3,4,5-trisphosphate (PIP3) 0 = inactive 1 = kinase active, generates PIP3
ILK	Internal	1	Q13418	ILK	Integrin-linked protein kinase (ILK) regulates integrin mediated signaling. 0 = inactive 1 = kinase active
AKT	Internal	1	P31749;P31751	AKT1;AKT2	RAC-alpha serine/threonine-protein kinases (AKT1/2) regulate many processes including proliferation, cell survival and growth. The full activation is obtained only if the kinase domain (Thr-308) and the two other in the C-terminal regulatory region (Ser-473 and Tyr-474) are phosphorylated. 0 = inactive 1 = phosphorylated, kinase domain active
GSK3B	Internal	1	P49841	GSK3B	Glycogen synthase kinase-3 beta (GSK3Beta) is a constitutively active protein kinase. It is involved in cell migration due to its role in phosphorylating Beta-catenin thus targeting it for degradation 0 = inactive 1 = active kinase
DVL	Internal	1	O14641	DVL2	Segment polarity protein dishevelled homolog 2 (DVL) participates in canonical and non-canonical Wnt signaling by binding to frizzled receptors and transducing signal to down-stream effectors. 0 = inactive 1 = active, phosphorylated
CK1	Internal	1	P49674	CSNK1E	Casein kinase I isoform epsilon (CK1) phosphorylates DVL1 and DVL2 thu activating the Wnt signal pathway 0 = inactive 1 = kinase active
FAT4	Internal	1	Q6V0I7	FAT4	Protocadherin FAT4 is a calcium-dependent adhesion protein which works as inhibitor of YAP1 induction. 0 = inactive 1 = active, ligand bound
LATS	Internal	1	O95835;Q9NRM7	LATS1;LATS2	Large tumor suppressor LATS1/2 are serine/threonine-protein kinases LATS1/2 which negatively regulates the Hippo signaling pathway by phopshorylating YAP1 and inhibiting its translocation into the nucleus. 0 = inactive 1 = phosphorylated active
NOTCH	Internal	1	P46531	NOTCH1	Neurogenic locus notch homolog protein 1 (NOTCH) is a receptor that regulates interaction between adjacent cells binding the cognate membrane bound ligands Jagged1, Jagged2 and Delta1. Upon ligand binding the notch intracellular domain (NICD) is released and forms a transcriptional activator complex. 0 = inactive 1 = active, delta ligand binding
YAP_TAZ	Internal	1	P46937;Q9GZV5	YAP1;WWTR1	Transcriptional coactivator YAP1 and WW domain-containing transcription regulator protein 1 (TAZ) are transcriptional regulator are targets of the Hippo pathway. Phosphorylation of YAP1 by LATS1/2 inhibits its translocation into the nucleus, upon release of the Hippo pathway they localize in the nucleus and activate cell growth and proliferation. 0 = localized at cytoplasm 1 = localized at nucleus
RPTP	Internal	1	Q15262	PTPRK	Receptor-type tyrosine-protein phosphatase (PTPR) 0 = inactive, not expressed 1 = active, homologous RPTP binding dimer formation
RAP1	Internal	1	P62834;P61224	RAP1A;RAP1B	Ras-related protein Rap-1A/B (Rap1) is involved in cell adhesion and cell junction formation by increasing ITG_AB avidity for substrate. 0 = inactive 1 = activate, guanine nucleotide-exchange factors (as C3G)
TGFBR	Internal	1	P36897;P37173	TGFBR1;TGFBR2	TGFBeta receptor type-1/2 (TGFBR) are a transmembrane serine/threonine kinase which transduces the TFGBs signal to regulate growth and differentiation of cells 0 = inactive 1 = active, ligand binding, dimer formation and autophosphorylation
JAK	Internal	1	P23458;O60674	JAK1;JAK2	Janus Kinase (JAK1/2) is a Tyrosine-protein kinase involved in the IFNalpha/beta/gamma and IL6 signaling by phosphorylating STATs protein family 0 = inactive 1 = kinase active, phosphorylated on Tyr residues
BCat	Internal	1	P35222	CTNNB1	Catenin beta-1 (Beta-catenin) is a cell adhesion and transcription regulator protein. It commonly localizes at the adherens junction where it binds E-Cadherin. The cytoplasmic fraction is tagged for degradation by GSK3Beta. Upon singaling (e.g. WNT) there is a phosphorylation of Beta-catenin and accumulation in the cytoplasm/nucleus where it regulates transcription 0 = not at the nucleus (membran…
NFkB	Internal	1	P19838;Q00653;Q04206	NFKB1;NFKB2;RELA	Nuclear factor NF-kappa-Beta (NFkB) is a homo- or heterodimeric complex formed that regulates transcription, cytokines production and stress response. 0 = inactive, constantly degraded 1 = active phosphorylated and subunit localizednucleus
SMAD	Internal	1	Q15796;Q13485	SMAD2;SMAD4	Mothers against decapentaplegic homolog 2 (SMAD2/4) are proteins which work as transducers of the TGFB receptor signaling 0 = cytoplasmic and transcriptionally inactive 1 = active complex formation SMAD2/4
STAT3	Internal	1	P40763	STAT3	Signal transducer and activator of transcription 3 (STAT3) signal transducer and transcription activator that mediates cellular responses to interleukins and interferon. Upon tyrosine phosphorylation it forms a dimer and translocate in the nucleus. 0 = cytoplasmic transcriptionally inactive 1 = active dimer formation and localized at nucleus
JNK	Internal	1	P45983;P45984	MAPK8;MAPK9	c-Jun N-Terminal Kinase 8/9 (JNK1/2) are a serine/threonine-protein kinase responsive to extracellular stress stimuli such as cytokines, heatshock or physical stress. 0 = inactive 1 = phosphorylated active
HIF1a	Internal	1	Q16665	HIF1A	Hypoxia-inducible factor 1-alpha (HIF1a) is a master regulator in hypoxic conditions of more than 40 genes. 0 = inactive 1 = active, induces gene expression
PAK	Internal	1	Q13153	PAK1	P21 (RAC1) Activated Kinase 1 (PAK1) plays a pivotal role in cell adhesion and migration, acting downstream of integrins. 0 = inactive 1 = phosphorylated active
CSL	Internal	1	Q06330	RBPJ	Recombining binding protein suppressor of hairless (CSL) can act as gene expression repressor when alone or as activator if bound to NICD 0 = inactive 1 = active as transcription factor when bound to Notch intracellular domain
TCF_LEF	Internal	1	P15884;Q9UJU2	TCF4;LEF1	Transcription factor 4 (TCF4) and Lymphoid enhancer-binding factor 1 (LEF1). Participates in the Wnt signaling pathway. Activates transcription of target genes in the presence of cytoplasmic Beta-catenin. 0 = inactive 1 = active and localized nucleus
SNAIL	Internal	1	O95863	SNAI1	Zinc finger protein SNAI1 (SNAIL) binds to 3 E-boxes of the E-cadherin/CDH1 gene promoter repressing its expression. Snail phosphorylation status regulates its trafficking: Ser 104 and 107 sites phosphorylated by GSK3Beta facilitate Snail nuclear exit; in the cytosol, Ser 96 and 100 phosphorylation (also by GSK3Beta) induce ubiquitination and degradation; the C-terminus of Snail can be phosphoryl…
SLUG	Internal	1	O43623	SNAI2	Zinc finger protein SNAI2 (SLUG). Transcriptional repressor of E-Cadherin/CDH1 transcription via binding to E-box elements on the promoter. 0 = not expressed 1 = expressed
ZEB	Internal	1	P37275;O60315	ZEB1;ZEB2	Zinc finger E-box-binding homeobox 1/2 (ZEB 1/2) repressor of E-cadherin transcription via binding to the E box (5'-CANNTG-3') 0 = not expressed 1 = expressed
miR200	Internal	1			miR200 is a family of microRNA highly present in epithelial tissue which regulates gene transcription. In particular, targets ZEB1/2 expression. 0 = not expressed 1 = expressed
ECad	Internal	1	P12830	CDH1	Cadherin-1 (E-Caderin) is a calcium-dependent cell adhesion molecule which localizes on the membrane anchoring actin microfilaments through alpha-, beta- and gamma-catenin forming adherens junction. 0 = not expressed 1 = expressed and present in the cytoplasm
ECad_AJ	Internal	2	P12830	CDH1	Cadherin-1 (E-Caderin) is a calcium-dependent cell adhesion molecule which localizes on the membrane anchoring actin microfilaments through alpha-, beta- and gamma-catenin forming adherens junction. 0 = not at the membrane 1 = localized at the membrane together with BCat, but rapidly internalized 2 = localized at the membrane and stabilized by p120
BCat_AJ	Internal	1	P35222	CTNNB1	Catenin beta-1 (Beta-catenin) is a cell adhesion and transcription regulator protein. It commonly localizes at the adherens junction where it binds E-Cadherin, the cytoplasmic fraction is tagged for degradation by GSK3Beta. Upon signaling (e.g. WNT) there is a phosphorylation of Beta-catenin and and accumulation in the cytoplasm/nucleus where it regulates transcription. 0 = not at the membrane 1 …
p120_AJ	Internal	1	O60716	CTNND1	Catenin delta-1 (p120-Catenin) associates with C-, E- and N-cadherins, increasing their membrane stability (by shielding important phosphorylation sites) thus strenghtening the adherens junction. 0 = not at the membrane 1 = localized at the membrane
AJ	Output	2	N/A	N/A	Epithelial phenotype output. Adherens Junction Cell-Cell contact. 0 = lack of adherens junction formation 1 = E-Cadherin expressed 2 = adherens junction formation, complex E-cadherin-Beta-catenin-p120 at the membrane
FA	Output	3	N/A	N/A	Mesenchymal phenotype output. Focal Adhesion formation between Cell and ECM. 0 = lack of migratory capacity 1 = PAK1 or FAK_SRC activation, stress fiber formation 2 = PAK1 and FAK_SRC activation, Focal adhesion recycling 3 = PAK1 and FAK_SRC and ITG_AB, Focal adhesions, migration over stiff surface

## Sheet: Interactions_annotations
				*References are provided in the file “Supplementary Figure and Table Legends and References”
Source	Target	Sign	PMIDs	Refs*	Comments
HGF	HGFR	+	1846706	(1)	(Bottaro et al. 1991) identified the oncogene cMET as the receptor of HGF in human mammary gland cells B5/589 treated with HGF.
EGF	EGFR	+	12954170;7680558	(2,3)	In A431 cells the subministration of EGF induces the phosphorylation of EGFR at multiple sites (Guo et al. 2003). Some of these residues as Tyr992 harbour SH2 binding sites (Sierke, Longo, and Koland 1993).
ECM	ITG_AB	+	16169468	(4)	(Paszek et al. 2005) hypothesized and that tissue stiffness could promote malignant behaviour by modulating integrins.Authors mentioned that: non-malignant MCF10A growing on normal mammary ECM (170 Pa) formed small growth-arrested and polarized acini with adherens junction and a central lumen. MCF10A could phosphorylate FAK on pY397 only on rigid ECM and thus recruit vinculin to the integrins. MC…
TGFB	TGFBR	+	1322148;8235612	(5,6)	TGFBeta receptors are serine/threonine kinase receptors (Massagué et al. 1992). The receptor II binds to TGFBeta and dimerize with receptor I of which catalize the phosphorylation (Ebner et al. 1993)
IL6	JAK	+	26297436	(7)	Zebrafish overexpressing human IL6 showed the activation of IL6 receptor gp130 hence JAK phosphorylation (Jung et al. 2015).
DELTA	NOTCH	+	2004417;11006133	(8,9)	Lateral inhibition Delta-Notch is also present in mammals (Heitzler and Simpson 1991). The physical interaction between Delta and Notch has been showed in drosophila by (Shimizu et al. 2000)
RPTP_L	RPTP	+	8264577	(10)	(Sap et al. 1994) reported that RPTPkappa creates cell-cell Interaction by homophilic bindings.
FAT4_L	FAT4	+	17045801;19048595	(11,12)	In Drosophila that FAT cadherin modulate the Salvador/Warts/Hippo Signaling Pathway (Bennet et al. 2006). (Qi et al. 2009) showed in mice NOG8 cells that loss of FAT4 expression disrupts Hippo pathway leading to an abnormal activation of YAP activity.
ROS	JNK	+	18206122	(13)	ROS oxidizes thioredoxin which dissociate from ASK-1 inducing its activation, resulting in the activation of JNK and p38 pathways (Matsuzawa and Ichijo 2008)
ROS	NFkB	+	27005664	(14)	The reduction of hypoxia-induced phosphorylation of IkappaBs on Serine 32 and 36 inhibits its activity resulting in an NFkappaB activation in a IKK dependent manner (D'Ignazio and Rocha 2016).
ROS	RPTP	-	16849327;15935774	(15,16)	(Y. Xu et al. 2006) showed how H2O2 addition to primary keratinocytes induces a reduction in the activity of RPTPkappa. (Denu and Tanner 1998) showed that PTP (internal and receptor like) can be reversibly-inhibited by ROS like hydrogen peroxide .
ROS	FAK_SRC	+	16024778	(17)	(Giannoni et al. 2005) showed how oxidative modification of SRC residues increase its activity in a manner and timing coherent with ROS generation. NIH3T3 cells that adhere on fibronectin show at first increase in SRC P-Y416 and then a second stronger peak at 45' (in correspondence of a ROS peak).
WNT	CK1	+	21670201;20940130	(18,19)	(del Valle-Perez, Casagolda, et al. 2011) reports that p120-catenin is phosphorylated on Ser268 and Ser269 by a mechanism depending from CK1epsilon (David Casagolda et al. 2010) and that is stimulated by Wnt ligand.
EGFR	RAS	+	8019005	(20)	(Margolis and Skolnik 1994) reported that after EGF receptor tyrosine kinase activation, docking sites for SH2 are formed. One of which involves the formation of Grb2/Sos complex, which can catalyze Ras GTP/GDP exchange.
EGFR	JAK	+	15284024	(21)	(Andl et al. 2004) showed that in primary esophageal keratinocytes activates STAT3 and STAT1 in a JAK dependent way. That can be abolished by the addition of JAK-inhibitor AG-490
EGFR	FAK_SRC	+	26079101	(22)	(Eberwein et al. 2015) EGFR can activate SRC through the activation of FAK in HPV16 E6/E7-immortalized corneal keratinocytes
HGFR	FAK_SRC	+	21119598	(23)	HeyA8 cells plated on fibronectin show FAK activation and MET activation. This double activation can be reduced by either targeting alpha5 with an antibody or MET with siRNA. The same cell line HeyA8 were plated on fibronectin and then treated with alpha5 antibody and different doses of HGF. Resulting in activation of SRC (Tyr416) and an increase in activation of FAK (Mitra et al. 2011).
HGFR	RAS	+	15077193;7997267	(24,25)	(Hecker et al. 2004) showed in U251MG cells that FAK generates an indirect induction of RAS by sequestering p120GAP (an inhibitor of RAS). (Schlaepfer et al. 1994) in NIH3T3 showed that SRC-mediated phosphorylation of FAK-Tyr925 create a docking site for GRB2.
HGFR	BCat	+	10425198;15226396	(26,27)	cMET can form complexes with Beta-catenin and upon activation release the catenin in the cytoplasm (Hiscox and Jiang 1999). cMET coimmunoprecipitation with Beta-catenin can be inhibited in a dose dependent manner with HGF (G. Xu et al. 2004)
ITG_AB	FAK_SRC	+	21119598	(23)	HeyA8 cells plated on fibronectin show FAK activation and MET activation. This double activation can be reduced by either targeting alpha5 with an antibody or MET with siRNA. The same cell line HeyA8 were plated on fibronectin and then treated with alpha5 antibody and different doses of HGF. Resulting in activation of SRC (Tyr416) and an increase in activation of FAK (Mitra et al. 2011).
ITG_AB	FA	+
ITG_AB	EGFR	+	11756413	(28)	(Moro et al. 2002) reported how NIH3T3 cells expressing human EGFR and plated on fibronectin showed a coimmunoprecipitation of beta1 and EGFR. ECV304 and human primary skin fibroblast adherent on matrix proteins stimulated EGFR phosphorylation and association with the beta1 integrin. SRC is activated when ECV304 cells are plated on integrin ligands indicating that integrin mediated adhesion induc…
ITG_AB	HGFR	+	21119598	(23)	(Mitra et al. 2011) reported that cMET coimmunoprecipitated with alpha5-integrin. Mice with SKOV3ip1 xenograft showed in vivo that human alpha5beta1-integrin antibody lowered cMET phosphorylation.
ITG_AB	ILK	+	12642872;8538749	(29,30)	ILK binds to beta1 and beta3 subunits of integrins (G. E. Hannigan et al. 1996). (Cruet-Hennequart et al. 2003) observed the effect of alphaV-integrin blockade on the ILK activity.
FAK_SRC	RAP1	+	9032297;11604500; 8070403;8524240; 19208836	(31–35)	(Ricono et al. 2009) using FG human pancreatic carcinoma cells showed a cascade of phosphorylation composed by: SRC_FAK-->p130CAS-->CrkII/C3G-->RAP1. Cell adhesion to anti-beta1 lead to RAC1 and RAP1 activation. The integrin adhesion generates the formation of a complex between FAK_SRC and p130CAS, the latter being a substrate for SRC phosphorylation (Schlaepfer et al. 1997, Russel et al. 2001). …
FAK_SRC	ECad_AJ	-	11836526	(36)	(Fujita et al. 2002) showed in HEK293 cells that E-cadherin ubiquitination was increased in the presence of v-SRC. In particular it was tyrosine phosphorylated and it was co-immunoprecipitated with the ubiquitin like protein Hakai.
FAK_SRC	BCat_AJ	-	16651417;10593980	(37,38)	(Koenig et al. 2006) showed that Panc-1 cells plated on Collagen I have an activation of FAK_SRC with an increased phosphorylation and nuclear localization of Beta-catenin. (Roura et al. 1999) showed in vitro that SRC can phosphorylate Beta-catenin and reduce its affinity for E-cadherin.
FAK_SRC	RPTP	-			Putative inhibition (see main text)
FAK_SRC	EGFR	+	11756413	(28)	(Moro et al. 2002) showed that ECV304 and NIH3T3 plated on fibronecting or Beta1 integrin ligands stimulated EGFR phosphorylation and complex formation with Beta1. This effect was SRC dependent since the kinase is activated upon plating. The treatment of the cells with SRC inhibitor showed absence of the complex formation between EGFR and the integrins. We considered the activation only at Level:…
FAK_SRC	RAS	+	15077193;7997267	(24,25)	(Hecker et al. 2004) In U251MG cells FAK generates an indirect induction of RAS by sequestering p120GAP (an inhibitor of RAS). (Schlaepfer et al. 1994) for NIH3T3 murine fibroblast the SRC-mediated phosphorylation of FAK-Tyr925 create a docking site for GRB2, thus linking RAS to integrin signaling.
FAK_SRC	PI3K	+	15166238	(39)	FAK activates PI3K in human lung fibrobast (Xia et al. 2004)
FAK_SRC	STAT3	+	9566874	(40)	(Turkson et al. 1998) showed in NIH3T3 transfected with v-SRC an increase in STAT3 activity in a dose dependent fashion from SRC which could be abrogated with inactive STAT3 expression.
FAK_SRC	PAK	+	9032297;11604500; 8070403;9808620; 8107774	(31–33, 41,42)	The integrin adhesion generates the formation of a complex between FAK_SRC and p130CAS, the latter being a substrate for SRC phosphorylation (Schlaepfer et al. 1997, Russel et al. 2001). The phosphorylated p130CAS then recruits Crk (Sakai et al. 1994) which work as adapter for the DOCK180 protein that is an activator of RAC1 (Kiyokawa et al. 1998). RAC1 then regulates PAK1 (Manser et al. 1994)
FAK_SRC	FA	+
FAK_SRC	JNK	+	10766791	(43)	(Yoshizumi et al. 2000) showed in fibroblast and vascular muscle dells that a knock-out of SRC or its inhibition by PP2 results in a blockade of the ROS dependent JNK activation. Thus SRC is the main regulator of ROS-mediated JNK activation via p130CAS dependent mechanism.
RAS	RAF1	+	11237210	(44)	GTP-RAS recruits RAF at the membrane and induces the formation of a RAF homo-dimer thus starting the phosphorylation chain (Avruch et al. 2001)
RAS	PI3K	+	9150145;15677464	(45,46)	As reported by (Rodriguez-Viciana et al. 1997) RAS is able in vitro and in intact cells to bind and activate PI3k. (Shin et al. 2005) showed in MCF10A cells, that H-RAS and N-RAS both activate PI3K pathway.
RAF1	MEK	+	8019005	(20)	RAF1 can phosphorylate and activate MEK (Gardner et al 1994).
MEK	ERK	+	1321146	(47)	MEKs phopshorylates the regulatory Tyr and Thr residues of ERK activating it (Seger et al. 1992)
ERK	GSK3B	-	16039586	(48)	(Q. Ding et al. 2005) showed, in hepatocellular carcinoma, that ERK phosphorylates and activates p90RSK, this phosphorylation of GSK3Beta on Ser9, which leads to the inactivation of GSK3Beta
ERK	SNAIL	+	19462441	(49)	Constitutively active MEK induces overexpression of SNAIL and SLUG, through ERK activated Fra-1 and Egr-1 (Lemieux et al. 2009), in rat intestinal epithelial crypt cell line IEC-6
ERK	SLUG	+	19462441	(49)	Constiuitively active MEK induces overexpression of SNAIL and SLUG, through ERK activated Fra-1 and Egr-1 (Lemieux et al. 2009), in rat intestinal epithelial crypt cell line IEC-6
ERK	FAT4	-	25679223	(50)	The transient activation of SRC represses FAT4 mRNA expression in MCF10A cells. SRC activation causes actin depolymerization via MEK/ERK/Cofilin cascade. SRC has been shown to elicit Cofilin-mediated disruption of the actin cytoskeleton through the MEK/ERK pathway. Treating MCF10A cells or MDA-MB-231 (malignant breast cancer cell), with MEK inhibitor (UO126 or PD0325901) induced FAT4 mRNA upregul…
PI3K	AKT	+	9005852;9094314	(51,52)	AKT activity correlates with the amount of phosphatidylinositol-3,4-bisphosphate (PtdIns-3,4-P2) in vivo (Franke et al. 1997). (Dario R. Alessi et al. 1997) showed that PDK1 uses PIP3 as a substrate to phosphorylate AKT thus increasing its activity.
PI3K	ILK	+	9736715	(53)	(Delcommenne et al. 1998) showed that in rat intestinal epithelial cells IEC18 treated with insulin there was an activation of ILK that could be inhibited by the addition of PI3K inhibitors (wortmannin or Ly294002).
PI3K	LATS	-	23359693	(54)	(Fan, Kim, and Gumbiner 2013) showed that PI3K inhibits LATS activity by destroying the complex that activate LATS. This has been proven in epithelial cells like MCF10A, MCF7, A431
PI3K	PAK	+	10995762	(55)	(King et al. 2000) showed that PAK1 is phosphorylated and activated by the PIP3 dependent kinase PDK1 and thus directly related to PI3K activity.
ILK	AKT	+	22310280	(56)	(Serrano et al. 2013), reported that epithelial cells incubated with TGFBeta1 showed an increased phosphorylation of AKT on Ser 473
AKT	GSK3B	-	15448698	(57)	Treatment with IGF or EGF (of MCF7-Snail cells and HEK293-Snail cells) lead to AKT activation, thus GSK3Beta inactivation (Zhou et al. 2004).
AKT	NFkB	+	19609947	(58)	AKT regulates the transcriptional activity of NF-kB by inducing the degradation of IkB (Bai et al. 2009).
GSK3B	BCat	-	23169527	(59)	GSK3Beta together with CK1alpha, APC and Axin form a destruction complex that phosphorylates Beta-catenin and tag it for ubiquitination and proteasomal degradation (Stamos et al. 2013).
GSK3B	SNAIL	-	15448698	(57)	GSK3Beta phosphorylate SNAIL regulating degradation or nuclear export (Zhou et al. 2004).
GSK3B	SLUG	-	23851495	(60)	GSK3Beta-mediated phosphorylation of SLUG facilitates the protein turnover (Kao et al. 2014).
DVL	GSK3B	-	10913153	(61)	(V. W. Ding, Chen, and McCormick 2000) showed in HEK293 cells a TCF_LEF reporter controlled by DVL/GSK3Beta
DVL	CSL	-	23132247	(62)	DVL binds to CSL proteins to reduce their level within the active transcription factor pool (Collu et al. 2012).
CK1	DVL	+	21606194	(63)	Wnt induces CK1epsilon activation, which in turn phosphorylates DVL (del Valle-Perez, Arques, et al. 2011).
CK1	p120_AJ	-	20940130	(19)	p120 catenin is phosphorylated at Ser268 in response to WNT by CK1epsilon (D. Casagolda et al. 2010)
FAT4	LATS	+	17045801;19048595	(11,12)	In Drosophila that FAT cadherin modulate the Hippo Signaling Pathway (Bennet et al. 2006). (Qi et al. 2009) showed in mice NOG8 cells that loss of FAT4 expression distrupts Hippo pathway leading to an abnormal activation of YAP.
LATS	YAP_TAZ	-	18158288	(64)	YAP is a substrate of LATS kinase, phosphorylation of YAP by LATS inhibits its translocation to the nucleus confining it in the cytoplasm (Hao et al. 2008).
NOTCH	CSL	+	19379690	(65)	Notch Intracellular domain enters the nucleus and together with CSL (RBPJ) and MAML1, stimulates transcription of target genes (Kopan et al. 2009).
YAP_TAZ	SMAD	+	25937570;18568018	(66,67)	YAP_TAZ can form complexes with SMAD2/3 affecting their capacity to shuttle into the nucleus (Varelas et al 2008 and Grannas 2015)
YAP_TAZ	DVL	+	20412773	(68)	(Varelas et al. 2010) loss of TAZ increases DVL phosphorylation and Wnt-dependent beta-catenin activation. The phosphorylated form of YAP_TAZ works as an inhibitor of DVL by sequestering it from CK1epsilon.
RPTP	BCat_AJ	+	8663237;18276111	(69,70)	(Fuchs et al. 1996) shows that RPTPkappa colocalizes with Beta-catenin at cell-cell AJ and that can form a complex with the armadillos proteins. (Novellino et al. 2008) showed using RPTPkappa in different cellular systems, including human melanomas, melanocytes and HEK293 cells, that RPTPkappa negatively affected Beta-catenin transcriptional signaling.
RPTP	ECad_AJ	+	9531566;7642713	(71,72)	Cadherins and RPTP-mu can form a complex (Brady-Kalnay et al 1998), The inhibition of PTPs activity through addition of pervanadate resulted in accumulation of tyrosine phosphorylated cadherins (Brady-Kalnay et al 1995).
RPTP	HGFR	-	10425198	(26)	(Hiscox and Jiang 1999) reported that RPTPmu immunoprecipitates with cMET in MCF7 and HRT18 cells
RPTP	EGFR	-	16263724	(73)	RPTPkappa can dephosphorylate EGFR (Xu et al. 2005)
RPTP	JNK	-	24002526	(74)	RPTPkappa can regulate the phosphorylation state and activity of JNK (Sun et al. 2013)
RAP1	ITG_AB	+	12546659;10688643	(75,76)	(Bos et al 2003) reported that RAP1 regulates integrins by mediating their spatial distribution and stabilizing them in an active conformation. (Katagiri et al 2000) reported that in Jurkat cells, the introduction of Rap1 induces integrin alphaLbeta2 (LFA1)-mediated adhesion to ICAMs
RAP1	p120_AJ	+	15857834	(77)	Rap1 effector AF6 associates with p120-catenin thus increasing the interaction of p120-catenin with E-cadherin (Hoshino et al. 2005)
TGFBR	SMAD	+	9759503	(78)	TGFBeta-RI can phosphorylates Smad2 and Smad3, triggering complex formation with Smad4 (Massague 1998).
TGFBR	RAS	+	17673906	(79)	TGFBeta-R I/II complex is able to phosphorylate ShcA, this induces it association with Grb2/Sos thus initiating the MAPK pathway (M. K. Lee et al. 2007) .
TGFBR	JNK	+	19114990	(80)	TGFBeta-R interact with TRAF6 and induces the formation of K63-linked poly-ubiquitin chains on TRAF6. Poly-ubiquitinated TRAF6 recruits TAK1 to activate JNK/p38 (Zhang 2009).
TGFBR	NFkB	+	23858099;20200282	(81,82)	NFkBeta is under the control of TGFBeta along the signaling pathway TAK1/IKK/NFkB (Ataie-Kachoie et al. 2013; Ear et al. 2010).
TGFBR	EGFR	+	19147560	(83)	TGFBR induces TNFalpha-converting enzyme (TACE) to release TNFalpha which can bind to EGFR (S. E. Wang et al. 2009).
JAK	STAT3	+	7612228	(84)	Activated JAK can phosphorylate one or more members of the STAT family (Ihle et al 1995)
JAK	RAS	+	9126968;8995399	(85,86)	(Giordano et al. 1997) showed in vitro evidence of JAK2-Shc complex formation and the consequent formation of Grb2/Sos supporting crosstalk between JAK and RAS. (Yin et al. 1997) reported in COS-1 cells that JAK1/2 phosphorylate the SHP-2 phosphatase, the site contains the preferred sequence motif for SH2 binding by Grb2. Moreover in COS-1 cells, co-transfected SHP-2 and JAK2 cDNAs, endogenous Gr…
BCat	TCF_LEF	+	23024173	(87)	TCF_LEF TFs are the end point mediators of Wnt signaling. They behave as repressor untinl its association with Beta-catenin (Cadigan et al. 2012)
NFkB	SNAIL	+	15286702	(88)	NFkBeta p65 subunit can induce SNAIL transcriptional activity (Barber‡ et al. 2004)
NFkB	HIF1a	+	18393939	(89)	(van Uden, Kenneth, and Rocha 2008) showed that NFkBeta different subunits bind to HIF1alpha promoter.
SMAD	SNAIL	+	18832382	(90)	SMAD and HMGA2 regulate SNAIL expression at the transcriptional level. Furthermore HMGA2 is induced by SMAD (Thuault et al. 2008).
STAT3	SNAIL	+	15129296;19724917	(91,92)	It represents a multistep interaction STAT3--ªLIV1--ªSNAIL. (Yamashita et al. 2004) showed in zebrafish embryo development that LIV1 (downstream target of STAT3) has a role in determining the nuclear localization of SNAIL. Similar results were shown in Panc-1 cells by (Unno et al. 2009).
STAT3	HIF1a	+	16007214	(93)	In MCF7 cells knock-down of STAT3 abrogate HIF1alpha expression (Q. Xu et al. 2005)
JNK	SNAIL	+	23557251	(94)	(Zhan et al. 2013) showed that interfering with JNK or c-Jun can dowregulate SNAIL (AP1 is dowtream of c-Jun and upregulate SNAIL).
JNK	BCat_AJ	-	19667122	(95)	JNK phosphorylates Beta-catenin and disrupt its localization with E-cadherin at the cell membrane. The experiments were performed on keratinocytes, A431 and MDCK epithelial cells and on HEK293T (M.-H. Lee et al. 2009).
HIF1a	SNAIL	+	18427106	(96)	HIF1alpha induces the transcription of LOX, this protein binds SNAIL protecting it from GSK3Beta phosphorylation and thus from degradation, thus having a stabilizing effect (Sahlgren et al. 2008).
HIF1a	SLUG	+	20509143	(97)	(Storci et al. 2010) showed in MCF7 that SLUG is under the control of the NFkB-HIF1alpha pathway.
PAK	SNAIL	+	15833848	(98)	PAK1 regulates nuclear localization of SNAIL by phosphorylation. Decreasing the nuclear export (Yang et al. 2005).
PAK	FA	+
CSL	SNAIL	+	18427106	(96)	NICD or CSL can induce SNAIL transcription (Sahlgren et al 2008).
CSL	SLUG	+	18663143;17984306	(99,100)	Slug is a direct Notch target in endothelial cells (Niessen et al 2008). Notch activation induces Slug mediated repression of E-cadherin (Leong et al. 2007).
CSL	NFkB	+	25048699;12107827;18059366	(101–103)	Notch intracellular domain increases NFkBeta activity (Kwon et al. 2014). Human keratinocytes Jag-1 induces NFkBeta activity (Nickoloff et al. 2002). Cross talk between Notch and NFkBeta (Osipo et al. 2008)
TCF_LEF	SLUG	+	14623871	(104)	(Conacci-Sorrell et al. 2003) reports how SLUG but not SNAIL promoter is activated by Beta-catenin-TCF_LEF signaling in HEK293T cells.
TCF_LEF	SNAIL	-	20372961;21633953	(105,106)	TCF_LEF-->miR30--|SNAIL, (Liao et al 2010 and Kumarswamy et al 2012).
SNAIL	ECad	-	14673164	(107)	SNAIL is a transcriptional repressor of E-cadherin (Peinado et al 2004).
SNAIL	ZEB	+	21317430;18347095	(108,109)	SNAIL and TWIST1 cooperate to activate the transcrition of ZEB1 in NMuMG (Dave et al. 2011) SNAIL induces ZEB2 expression vial alternative processing of its mRNA (Beltran et al. 2008)
SNAIL	miR200	-	22514743;21394833	(110,111)	(Moes et al. 2012) showed that miR200b promoter activity was significantly decreased upon SNAIL induction in HEK293T and HCT116 cells. SNAIL has been shown to repress miR200 in murine embryonic stem cell differentiation (Gill et al. 2011).
SLUG	ECad	-	12508111	(112)	(BolÛs et al. 2003b) SLUG is a transcriptional repressor of E-cadherin.
SLUG	ZEB	+	21593765	(113)	(Wels et al. 2011) showed that SLUG induce ZEB1 transcriptional activity in keratinocytes.
ZEB	miR200	-	18829540	(114)	(Bracken et al. 2008) there is a double negative feedback loop between miR200 and ZEB.
ZEB	ECad	-	15674322	(115)	(Eger et al. 2005) ZEB is a transcriptional repressor of E-cadherin.
miR200	ZEB	-	18829540	(114)	(Bracken et al. 2008) showed that there is a double negative feedback loop between miR200 and ZEB.
miR200	SLUG	-	22370643	(116)	(Liu et al2013) showed that miR200 can inhibit SLUG. miR-200b directly regulate the stability or translation of SLUG mRNA.
miR200	ECad	+	25798844;18381893;21394833	(111,117,118)	According to (Perdig-Henriques et. al 2016) miR-200 overexpression induced RNA polymerase II localization and reduced ZEB2 and SNAI1 complexes binding to epithelial gene promoters in 4TO7 cells. Also ectopic expression of miR200 in cancer cells restore ECadherin expression and slows migration (Park et al. 2008). (Gill et al. 2011) found in ESC that SNAIL drives the EMT and is correlated with the …
ECad	ECad_AJ	+			Modeling interaction, maturation of the mRNA and translocation of the protein to the membrane.
ECad	AJ	+
ECad_AJ	AJ	+
ECad_AJ	LATS	+	21730131	(119)	(N.-G. Kim et al. 2011) showed in MDA-MB-231 cell line that expression of full-length E-cadherin caused the redistribution of YAP from nucleus to cytoplasm in dense cell cultures, suggesting that E-cadherin is required for the density-dependent regulation of YAP localization.
ECad_AJ	RAP1	+	16219685;15254236	(120,121)	RAP1 is activated upon Adherens Junction disassembly (C3G and PDZ-GEF bind respectively to E-cadherin and Beta-catenin) or upon SRC activation. RAP1 immunoprecipitates with E-Cadherin, Beta-catenin or alpha-catenin but not p120Ctn. The more there is disassembly of adherens junction, the more complex precipitate. Treatments of the cells with PP2 (SRC inhibitor) showed reduction in the complex form…
ECad_AJ	p120_AJ	+	7876318	(122)	p120 is associated with E-cadherin using the human carcinoma cell line HT29 (Shibamoto et al. 1995)
ECad_AJ	BCat_AJ	+			Modeling interaction, E-cadherin is propely localized at the membrane only if shuttled by Beta-catenin (Chen et al 1999).
BCat_AJ	LATS	+	21730131	(119)	Depletion of Beta-catenin in densely cultured MCF10A cells resulted in increased nuclear accumulation of YAP and decreased YAP phosphorylation on the S127 (similar results for A431 and MCF7) (N.-G. Kim et al. 2011).
BCat_AJ	BCat	-			Modeling interaction that account for increased cytoplasm concentration of Beta-catenin once it is released from the membrane (thus the inhibition sign).
BCat_AJ	ECad_AJ	+	10037790	(123)	Modeling interaction, E-cadherin is properly localized at the membrane only if shuttled by Beta-catenin (Chen et al 1999).
p120_AJ	p120_AJ	+			Modeling interaction, p120 stabilize the E-Cad/B-Cat and this junction is maintained.
p120_AJ	RAP1	-	16219685	(120)	Modeling interaction, RAP1 is usually induced by unbounded E-Cad or E-Cad/B-Cat complexes that are internalized because are not stablilized by p120. the downregulation of RAP1 activity is strongly correlated with strengthening of cadherin adhesions (Balzac et al 2005)

## Sheet: Logical_rules
Node	Type	Level	Regulatory rules (logical functions) – Boolean operators AND (&), OR (|) and NOT (!)	Comments
HGF	Input	1	N/A
EGF	Input	1	N/A
ECM	Input	1	N/A
TGFB	Input	1	N/A
IL6	Input	1	N/A
DELTA	Input	1	N/A
RPTP_L	Input	1	N/A
FAT4_L	Input	1	N/A
ROS	Input	1	N/A
WNT	Input	1	N/A
EGFR	Internal	1	(EGF | (FAK_SRC:2 & ITGab) | TGFBR) & !RPTP	Default rule. FAK_SRC acts together with Integrin (upon their activation). FAK_SRC is required at level 2 due to the fact that it targets a secondary site of phosphorylation compared to the other.
HGFR	Internal	1	(HGF | ITGab) & !RPTP	Default rule.
ITG_AB	Internal	1	ECM & RAP1	ECM signal can pass through the ITG_ab cascade only in the presence of RAP1, since it increases the integrin avidity for ligand
FAK_SRC	Internal	1	(ROS_Hypoxia & !ITGab) | ((EGFR | cMET) & !ITGab) | (ITGab & !(ROS_Hypoxia | (EGFR & cMET)))	The presence of only ITGab, or of only ROS or of one between EGFR and HGFR induces a minor activation of FAK_SRC. Upon binding to ITGab FAK_SRC is activate, and its kinase activity is increased upon the presence of ROS hinting an additive effect. Similar assumption for EGFR and HGFR acting together with ITGab.
FAK_SRC	Internal	2	(ROS_Hypoxia & ITGab) | (ITGab & cMET & EGFR)
RAS	Internal	1	EGFR | FAK_SRC | JAK | cMET | TGFBR	Default rule.
RAF1	Internal	1	RAS	Default rule.
MEK	Internal	1	RAF1	Default rule.
ERK	Internal	1	MEK	Default rule.
PI3K	Internal	1	RAS | FAK_SRC	Default rule.
ILK	Internal	1	ITGab & PI3K	ILK binds to Integrin Beta subunits and requires these and PIP3 to be active.
AKT	Internal	1	PI3K & ILK	Multiple active phosphorylation sites are required ( Thr-308, Ser-473 and Tyr-474). The two kinases are responsible for different sites, thus the AND rule
GSK3B	Internal	1	!AKT & !ERK & !DVL	AKT, ERK or DVL can (directly/indirectly) phopshorylate GSK3Beta at its Ser9 site inactivating it
DVL	Internal	1	CK1 & YAP_TAZ	the phosphorylated form of YAP_TAZ works as an inhibitor of DVL by sequestering it from CK1 phosphorylation.
CK1	Internal	1	WNT	Default rule.
FAT4	Internal	1	FAT4L & !ERK	Default rule.
LATS	Internal	1	(FAT4 | (ECad_ADJ & BCat_ADJ)) & !PI3K	the presence of ADJ (Ecad_ADJ & Bcad_ADJ) or the active form of FATL can activate LATS, PI3K is an inhibitor
NOTCH	Internal	1	DELTA	Default rule.
YAP_TAZ	Internal	1	!LATS	Default rule.
RPTP	Internal	1	RPTPL & !FAK_SRC:2 & !ROS_Hypoxia	Default rule., postulated inhibition of FAK_SRC at level 2 since the inhibition happens upon SRC overactivation
RAP1	Internal	1	FAK_SRC | (ECad_ADJ:2 & !p120Ctn_ADJ)	RAP1 activation as due to AJ turnover unless there is a stabilization of the same at the membrane (p120Ctn_ADJ) Or as direct consequence of SRC activation.
TGFBR	Internal	1	TGFB	Default rule.
JAK	Internal	1	IL6 | EGFR	Default rule.
BCat	Internal	1	!GSK3B | !BCat_ADJ | cMET	BetaCatenin can be released in the cytoplasm by cMET activation, or if ADJ are dismantled or if the destruction complex (GSK3Beta) is inactivated
NFkB	Internal	1	AKT | CSL | ROS_Hypoxia | TGFBR	Default rule.
SMAD	Internal	1	TGFBR & YAP_TAZ	TGFBR induces SMAD2/4 complex formation that needs YAP_TAZ to become transcriptionally active in the nucleus
STAT3	Internal	1	JAK | FAK_SRC	Default rule.
JNK	Internal	1	(TGFBR | ROS_Hypoxia | FAK_SRC) & !RPTP	Default rule.
HIF1a	Internal	1	NFkB & STAT3	STAT3 is required for HIF1a expression
PAK	Internal	1	FAK_SRC | PI3K	Default rule.
CSL	Internal	1	NOTCH & !DVL	Default rule.
TCF_LEF	Internal	1	BCat	Default rule.
SNAIL	Internal	1	(SMAD | ERK | CSL | JNK | NFkB) & (!GSK3B | HIF1a) & (!GSK3B | PAK | STAT3) & (!TCF_LEF | SMAD | (ERK & CSL & JNK) | (ERK & CSL & NFkB) | (ERK & JNK & NFkB) | (CSL & JNK & NFkB))	SMAD, ERK, CSL, JNK and NFkB induce SNAIL expression while TCF_LEF can inhibit it. The first parenthesis describe the expression induction, the last instead describe how TCF_LEF effect can be compensated by the presence of multiple inducers, SMAD has a higher weight given the observed fold change in SNAIL expression upon TGFBeta treatments. GSK3B, HIF1a, PAK and STAT3 regulate the shuttling of SN…
SLUG	Internal	1	(TCF_LEF | ERK | CSL | HIF1a) & !miR200 & !GSK3B	Default rule.
ZEB	Internal	1	!miR200 & (SNAIL | SLUG)	Default rule.
miR200	Internal	1	!ZEB & !SNAIL	Default rule.
ECad	Internal	1	(!SNAIL | miR200) & !SLUG & !ZEB	SNAIL, SLUG and ZEB can repress E-Cadherin mRNA expression. miR200 is able to bind and inhibits SNAIL transcription
ECad_AJ	Internal	1	ECad & !BCat_ADJ & (RPTP | !FAK_SRC)	Ecadherin stability at the membrane can be increased by binding to BetaCatenin. RPTP and FAK_SRC dephosphorylate and phosphorylate tyrosine sites in competition. Increasing Ecadherin internalization and ubiquitination
ECad_AJ	Internal	2	Ecad & BCat_ADJ & (RPTP | !FAK_SRC)
BCat_AJ	Internal	1	ECad_ADJ & !JNK & (RPTP | !FAK_SRC)	BetaCatenin requires binding with Ecadherin at the membrane to stabilize, JNK can phopshorylates it reducing its binding affinity for Ecadherin. FAK_SRC and RPTP phopshorylates and dephosphorylates tyrosine sites thus in direct competition.
p120_AJ	Internal	1	ECad_ADJ & !CK1 & (RAP1 | p120Ctn_ADJ)	p120_Ctn requires Ecadherin to bind at the membrane, this binding is increased by RAP1 and will become stable (RAP1|p120_Ctn) until active CK1 will phopshorylates p120_Ctn reducing its binding affinity
AJ	Output	1	Ecad & !ECad_ADJ
AJ	Output	2	Ecad & Ecad_ADJ
FA	Output	1	FAK_SRC | PAK
		2	FAK_SRC & PAK
		3	ITGab & FAK_SRC & PAK
